# Supplementary material
Source: publisher figshare collection journal article supplement (https://acs.figshare.com/ndownloader/files/14611412)
Supplement: Supplementary file 1 [file 14611412]

## **Supplementary Material for Macromolecules**

### **Nanorod diffusion in polymer nanocomposites by molecular dynamics simulations**

Argyrios Karatrantos,<sup>1</sup> Russell J. Composto,<sup>2</sup> Karen I. Winey,<sup>2</sup> and Nigel Clarke<sup>3</sup>

<sup>1</sup> *Department of Physics and Astronomy, University of Sheffield, Sheffield S3 7RH, United Kingdom*

<sup>2</sup> *Department of Materials Science and Engineering,*

*University of Pennsylvania, Philadelphia, Pennsylvania, 19104, USA*

<sup>3</sup> *Department of Physics and Astronomy, University of Sheffield, Sheffield S3 7RH, United Kingdom*

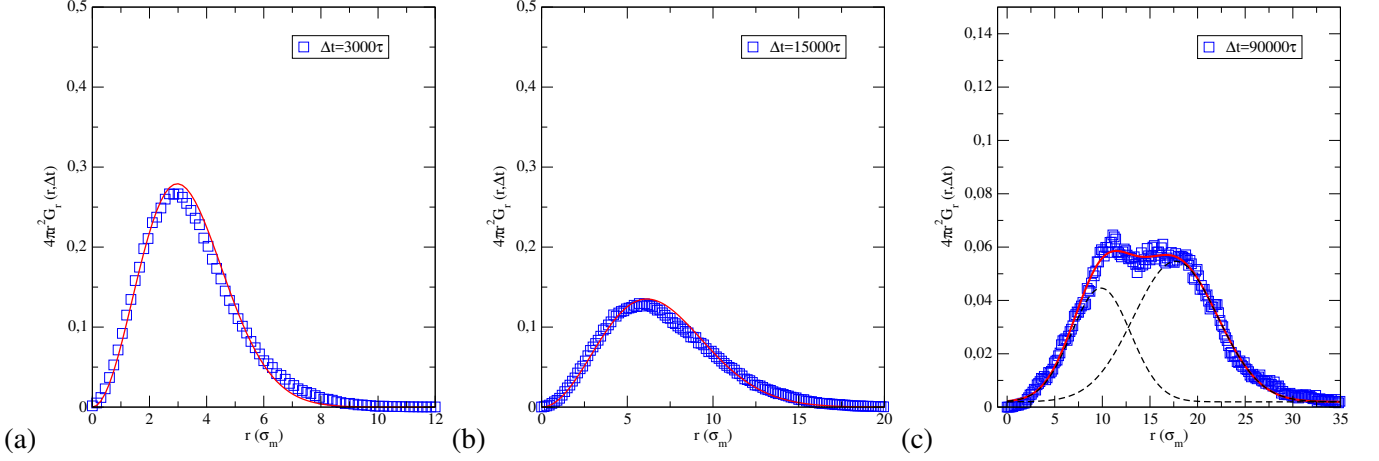

FIG. S1: van Hove function  $G_s(r, \Delta t)$  for nanorods in nanocomposite, nanorod diameter  $D = 3$ ,  $AR = 8$  polymer matrix  $N = 10$ , at three different  $\Delta t$ . Blue symbols are data from the simulations, and solid lines are fitting of Equation 9 in the first two panels (a)+(b) for  $\Delta t \leq 15\tau$ , while the right panel (c) for larger time interval  $\Delta t = 90\tau$  can only be fitted by a superposition of two Gaussians. The individual contributions are shown by black dashed lines.

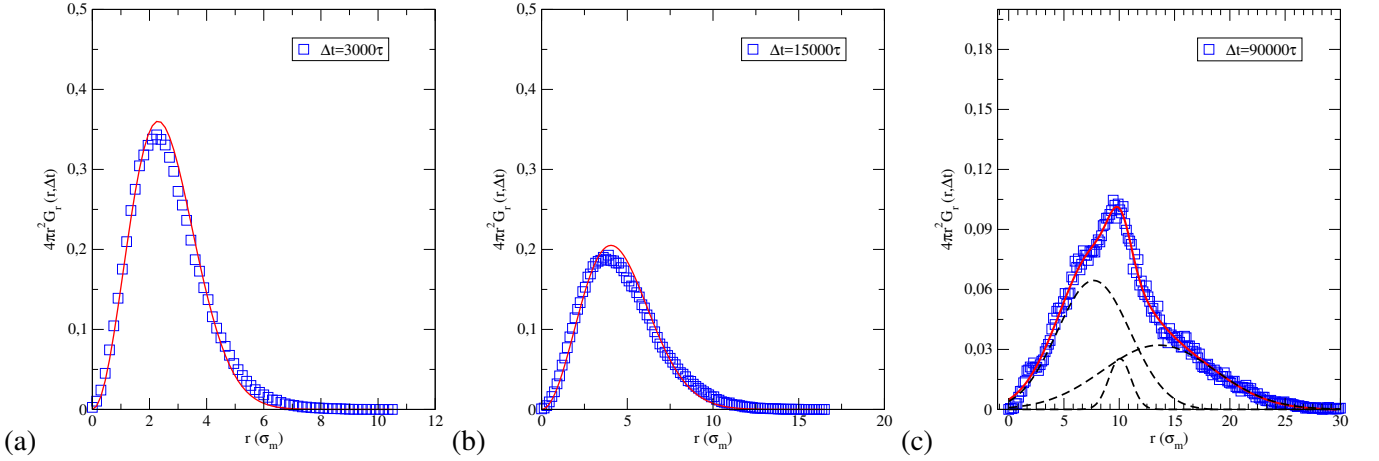

FIG. S2: van Hove function  $G_s(r, \Delta t)$  for nanorods in nanocomposite, nanorod diameter  $D = 3$ ,  $AR = 8$  polymer matrix  $N = 20$ , at three different  $\Delta t$ . Blue symbols are data from the simulations, and solid lines are fitting of Equation 9 in the first two panels (a)+(b) for  $\Delta t \leq 15\tau$ , while the right panel (c) for larger time interval  $\Delta t = 90\tau$  can only be fitted by a superposition of three Gaussians. The individual contributions are shown by black dashed lines.

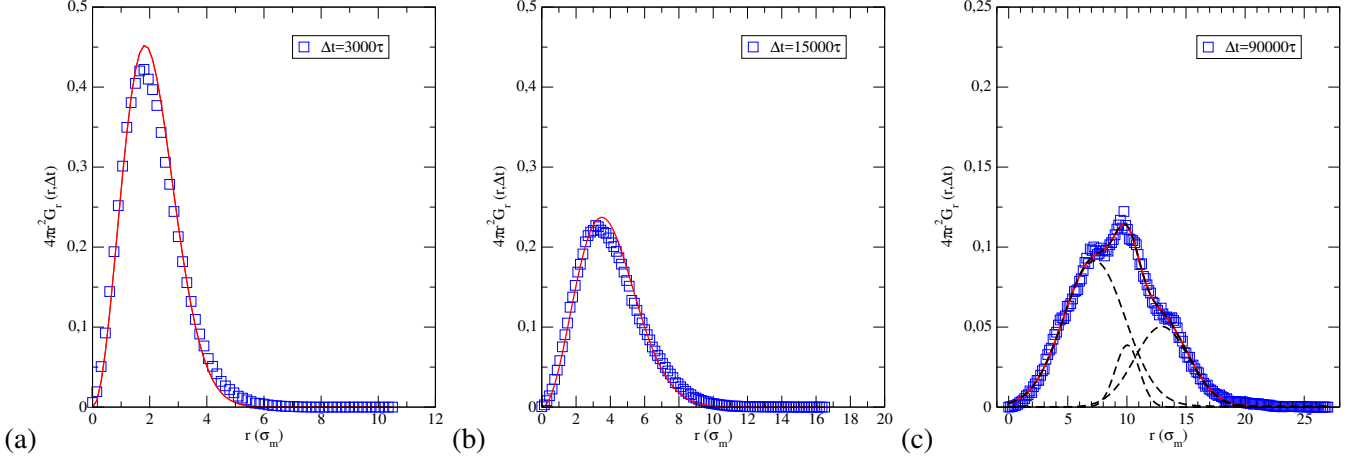

FIG. S3: van Hove function  $G_s(r, \Delta t)$  for nanorods in nanocomposite, nanorod diameter  $D = 3$ ,  $AR = 8$  polymer matrix  $N = 50$ , at three different  $\Delta t$ . Blue symbols are data from the simulations, and solid lines are fitting of Equation 9 in the first two panels (a)+(b) for  $\Delta t \leq 15\tau$ , while the right panel (c) for larger time interval  $\Delta t = 90\tau$  can only be fitted by a superposition of three Gaussians. The individual contributions are shown by black dashed lines.

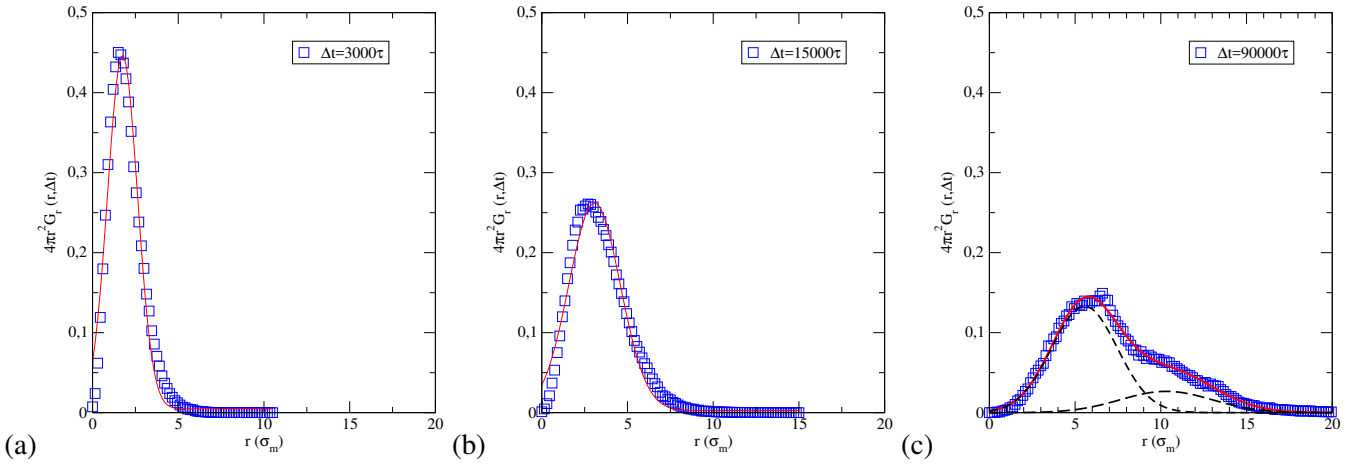

FIG. S4: van Hove function  $G_s(r, \Delta t)$  for nanorods in nanocomposite, nanorod diameter  $D = 3$ ,  $AR = 8$  polymer matrix  $N = 100$ , at three different  $\Delta t$ . Blue symbols are data from the simulations, and solid lines are fitting of Equation 9 in the first two panels (a)+(b) for  $\Delta t \leq 15\tau$ , while the right panel (c) for larger time interval  $\Delta t = 90\tau$  can only be fitted by a superposition of two Gaussians. The individual contributions are shown by black dashed lines.

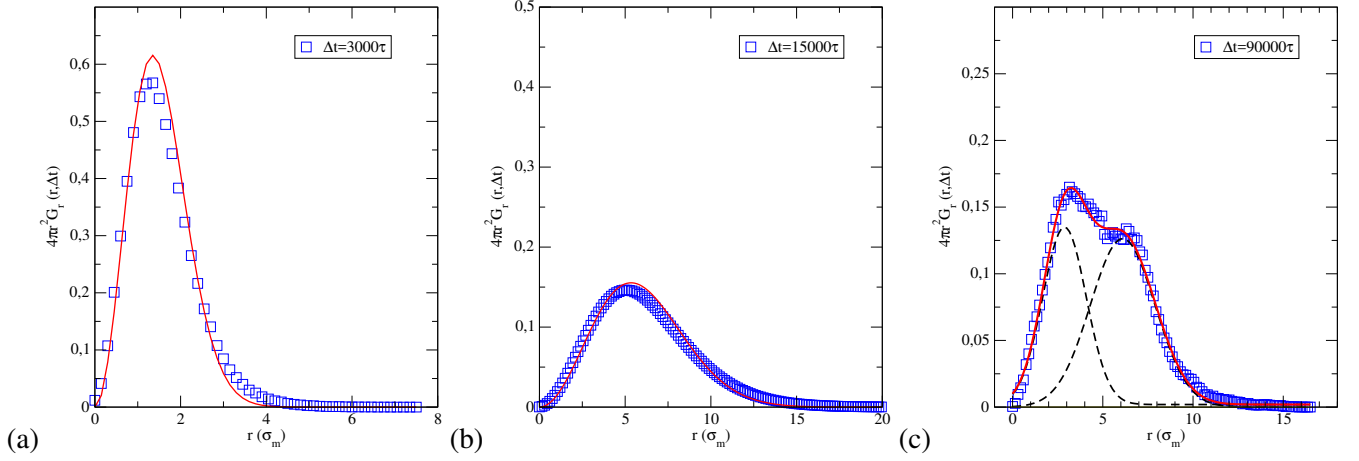

FIG. S5: van Hove function  $G_s(r, \Delta t)$  for nanorods in nanocomposite, nanorod diameter  $D = 4, AR = 8$  polymer matrix  $N = 100$ , at three different  $\Delta t$ . Blue symbols are data from the simulations, and solid lines are fitting of Equation 9 in the first two panels (a)+(b) for  $\Delta t \leq 15\tau$ , while the right panel (c) for larger time interval  $\Delta t = 90\tau$  can only be fitted by a superposition of two Gaussians. The individual contributions are shown by black dashed lines.

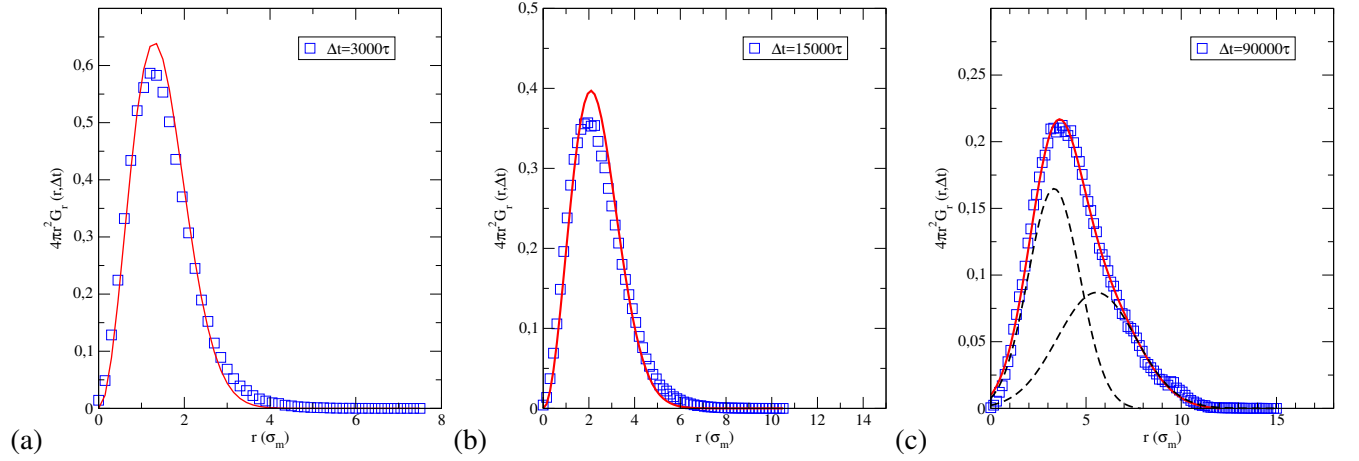

FIG. S6: van Hove function  $G_s(r, \Delta t)$  for nanorods in nanocomposite, nanorod diameter  $D = 4, AR = 8$  polymer matrix  $N = 400$ , at three different  $\Delta t$ . Blue symbols are data from the simulations, and solid lines are fitting of Equation 9 in the first two panels (a)+(b) for  $\Delta t \leq 15\tau$ , while the right panel (c) for larger time interval  $\Delta t = 90\tau$  can only be fitted by a superposition of two Gaussians. The individual contributions are shown by black dashed lines.

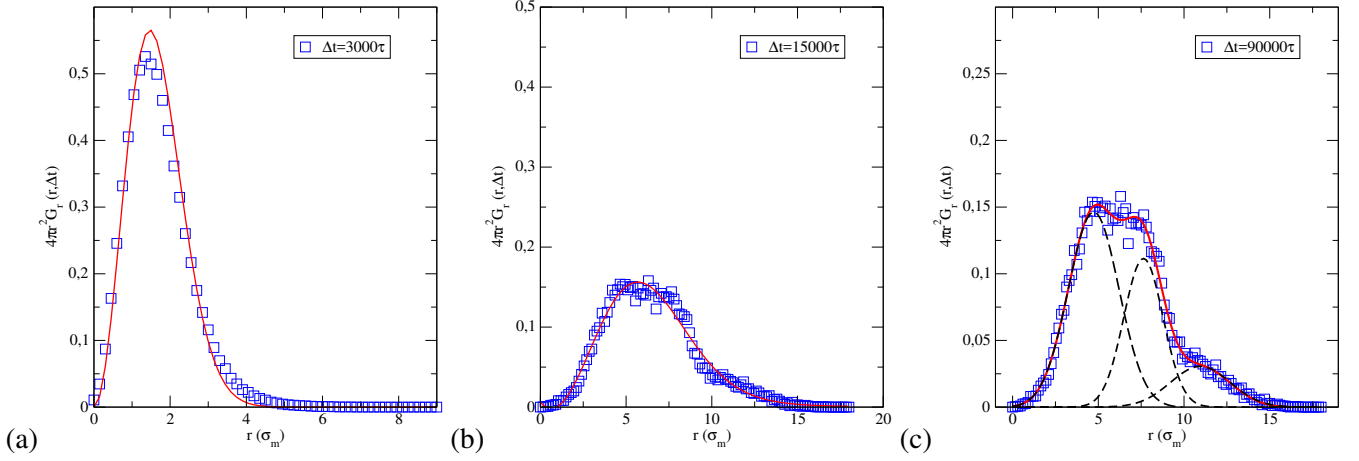

FIG. S7: van Hove function  $G_s(r, \Delta t)$  for nanorods in nanocomposite, nanorod diameter  $D = 4$ ,  $AR = 8$ , polymer matrix  $N = 50$ , at three different  $\Delta t$ . Blue symbols are data from the simulations, and solid lines are fitting of Equation 9 in the first two panels (a)+(b) for  $\Delta t \leq 15\tau$ , while the right panel (c) for larger time interval  $\Delta t = 90\tau$  can only be fitted by a superposition of three Gaussians. The individual contributions are shown by black dashed lines.

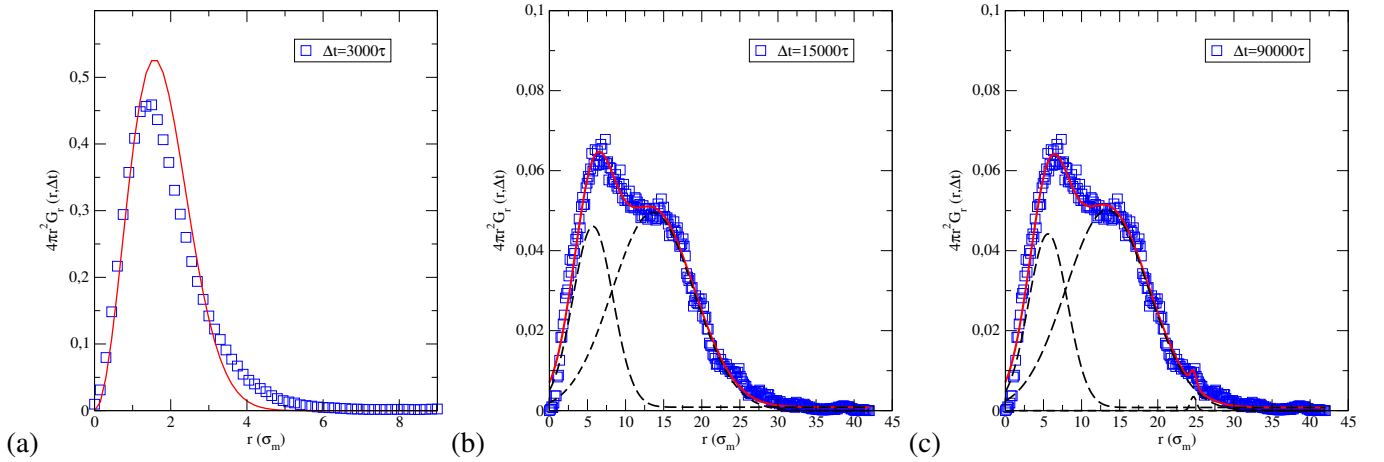

FIG. S8: van Hove function  $G_s(r, \Delta t)$  for nanorods in nanocomposite, nanorod diameter  $D = 4$ ,  $AR = 8$  polymer matrix  $N = 20$ , at three different  $\Delta t$ . Blue symbols are data from the simulations, and solid lines are fitting of Equation 9 in the first panel (a) for  $\Delta t = 3\tau$ , while the other two panels (b)+(c) for larger time interval  $\Delta t = 15, 90\tau$  can only be fitted by a superposition of two Gaussians. The individual contributions are shown by black dashed lines.

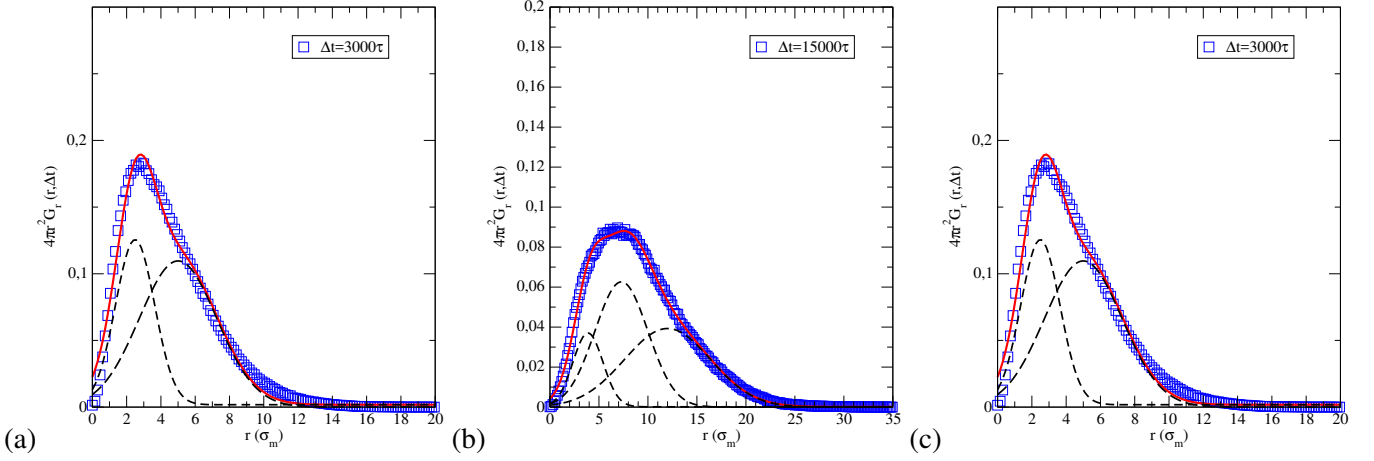

FIG. S9: van Hove function  $G_s(r, \Delta t)$  for nanorods in nanocomposite, nanorod diameter  $D = 2$ ,  $AR = 8$  polymer matrix  $N = 100$ , at three different  $\Delta t$ . Blue symbols are data from the simulations, and solid lines are fitting by a superposition of two or three Gaussians. The individual contributions are shown by black dashed lines.

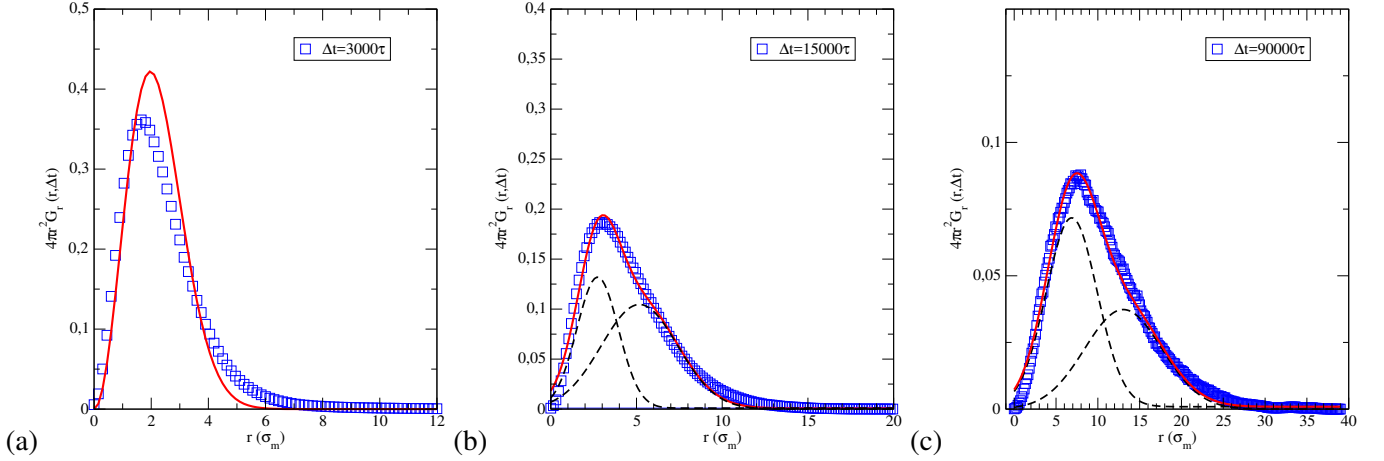

FIG. S10: van Hove function  $G_s(r, \Delta t)$  for nanorods in nanocomposite, nanorod diameter  $D = 1$ ,  $AR = 16$  polymer matrix  $N = 50$ , at three different  $\Delta t$ . Blue symbols are data from the simulations, and solid lines are fitting of Equation 9 in the first panel (a) for  $\Delta t = 3\tau$ , while the other 2 panels (b)+(c) for larger time intervals  $\Delta t = 15, 90\tau$  can only be fitted by a superposition of two Gaussians. The individual contributions are shown by black dashed lines.

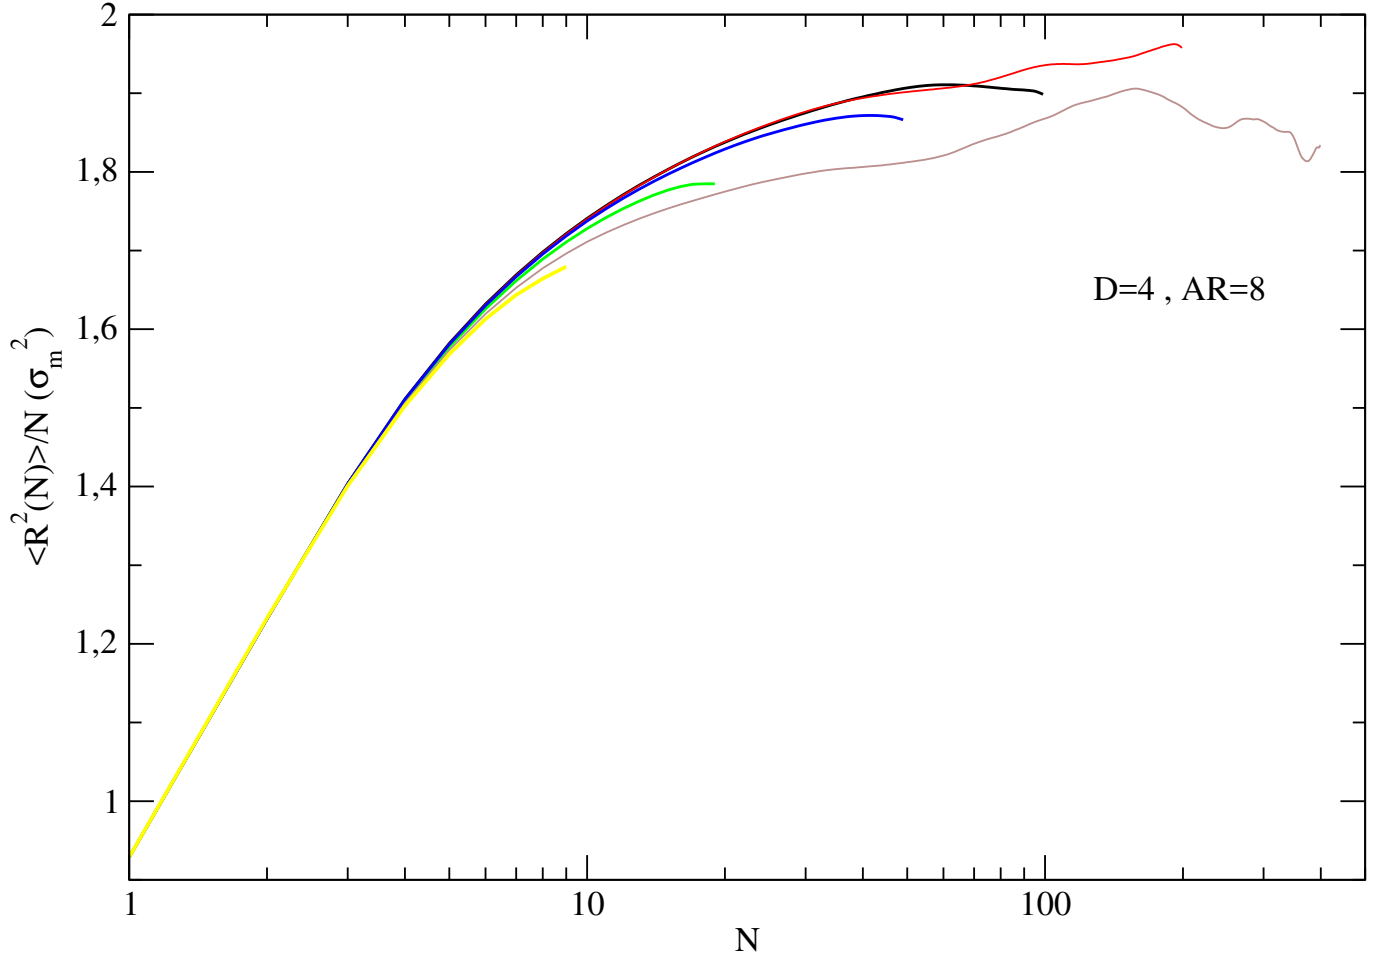

FIG. S11: Mean square internal distances for polymers in nanocomposites containing nanorods ( $D = 4$ ) with  $AR = 8$ .

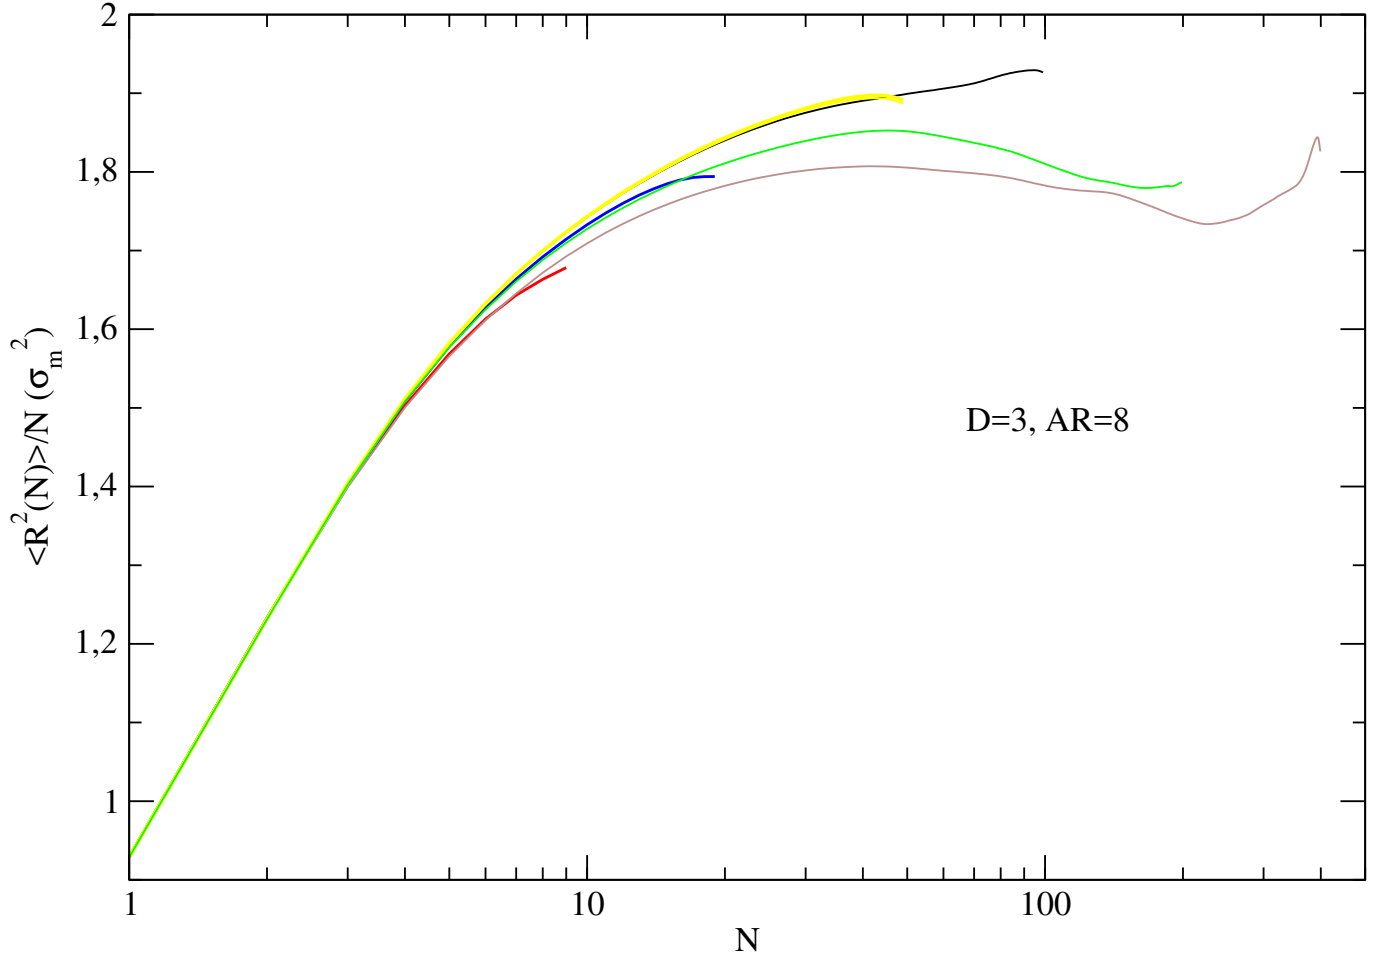

FIG. S12: Mean square internal distances for polymers in nanocomposites containing nanorods ( $D = 3$ ) with  $AR = 8$ .

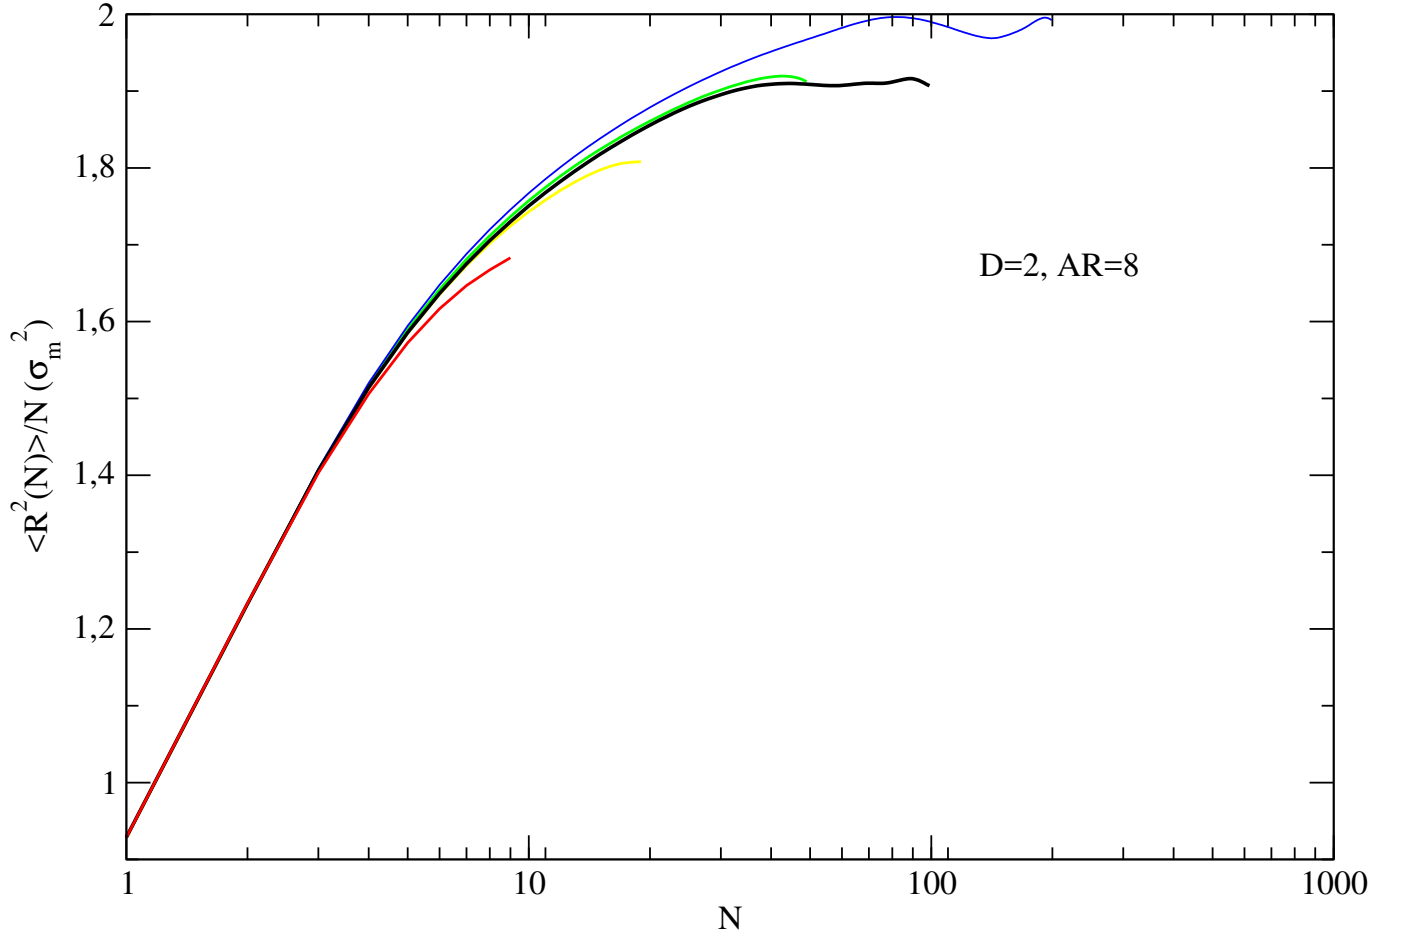

FIG. S13: Mean square internal distances for polymers in nanocomposites containing nanorods ( $D = 2$ ) with  $AR = 8$ .

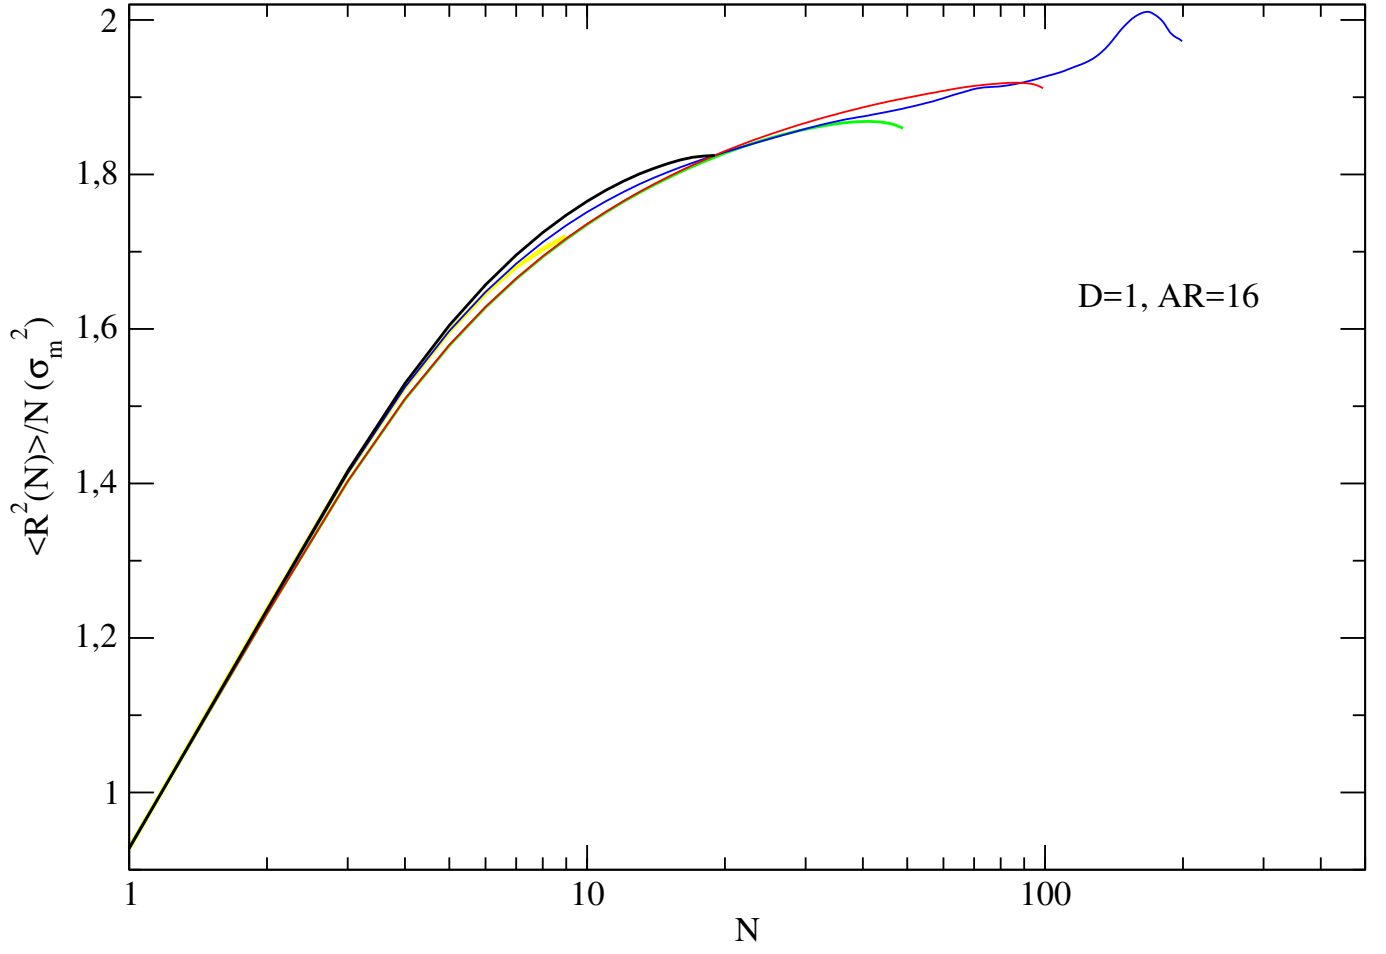

FIG. S14: Mean square internal distances for polymers in nanocomposites containing nanorods ( $D = 1$ ) with  $AR = 16$ .

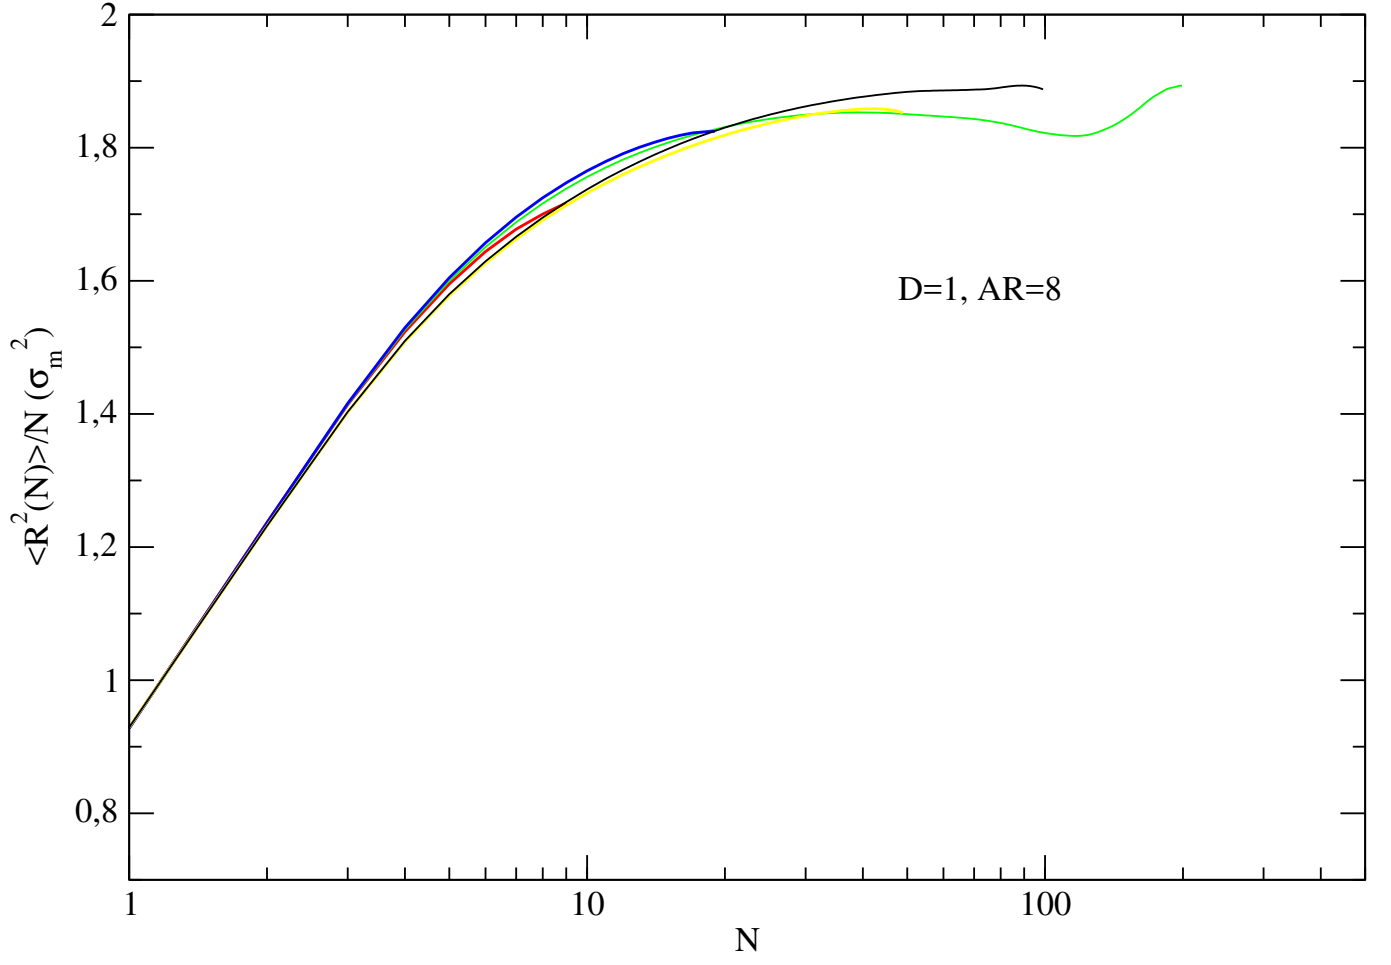

FIG. S15: Mean square internal distances for polymers in nanocomposites containing nanorods ( $D = 1$ ) with  $AR = 8$ .
